# Supplementary material
Source: publisher figshare collection journal article supplement (https://karger.figshare.com/ndownloader/files/26202143)
Supplement: Supplementary file 1 [file 26202143]

**Energy consumption:**

Energy consumption (kcal /week) = MET * Times per week * Minutes per time * Weight(kg)/60). Physical activities included walking (4.0 MET), indoor housework (3.5 MET), outdoor housework (5.0 MET), dancing (4.5 MET), playing ping-pong (4.0 MET) and other regular exercises (5.0 MET).
